# Supplementary material for: Polymers of intrinsic microporosity as high temperature templates for the formation of nanofibrous oxides
Source: Royal Society of Chemistry journal article supplement (doi:10.1039/c5ra15131g), 2015-01-01
Supplement: c5ra15131g1.pdf [file c5ra15131g1.pdf]

SUPPORTING INFORMATION

Polymers of Intrinsic Microporosity as High Temperature  
Templates for the Formation of Nanofibrous Oxides

Received 00th January 20xx,  
Accepted 00th January 20xx

DOI: 10.1039/x0xx00000x

www.rsc.org/

H. Al Kutubi,<sup>a,b</sup> L. Rassaei,<sup>b</sup> W. Olthuis,<sup>c</sup> G. W. Nelson,<sup>d</sup> J. S. Foord,<sup>e</sup> P. Holdway,<sup>f</sup> M. Carta,<sup>g</sup> R. Malpass-Evans,<sup>g</sup> N. B. McKeown,<sup>g</sup> S. C. Tsang,<sup>h</sup> R. Castaing,<sup>a</sup> T. R. Forder,<sup>a</sup> M. D. Jones,<sup>a</sup> D. He,<sup>a</sup> and F. Marken<sup>\*a</sup>

Supporting information are provided in the form of additional scanning electron micrographs and EDX elemental analysis for materials produced in the thermolysis reaction of  $\text{Pr}(\text{NO}_3)_3$  embedded in polymers of intrinsic microporosity.

Figure SI1 shows scanning electron micrographs for products formed on ITO substrates for the deposition of (A) 4:1, (B) 2:1, and (C) 1:1 weight ratio of PIM-EA-TB and  $\text{Pr}(\text{NO}_3)_3$  followed by calcination at 500 °C in air. The fibrous appearance and nano-structure appears to be not strongly affected by the initial ratio of PIM-EA-TB to  $\text{Pr}(\text{NO}_3)_3$ . Additional EDX data in Figure SI1D demonstrate the presence of Pr and oxygen in addition to In/Sn/Si from the substrate. The data are consistent with the presence of  $\text{Pr}_6\text{O}_{11}$ . Although further bulk elemental analysis would be required to confirm impurity and doping effects as well as phase purity for these materials.

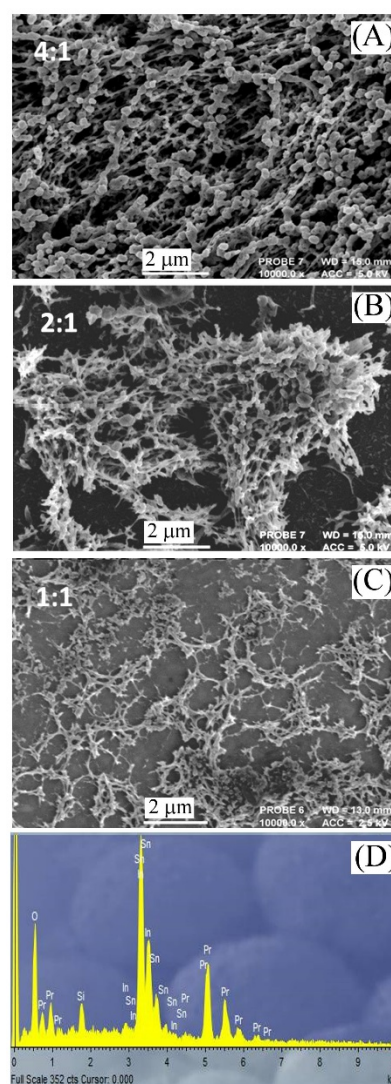

**Figure SI1.** Scanning electron micrographs for thermolysis products (10-layer on ITO) employing PIM-EA-TB :  $\text{Pr}(\text{NO}_3)_3$  in weight ratio (A) 4:1, (B) 2:1, and (C) 1:1. Also shown in (D) is the EDX elemental analysis for the 1:1 praseodymium oxide film.

<sup>a</sup> Remi Castaing, Dr. Thomas R. Forder, Dr. Matthew D. Jones, Dr. Daping He, Prof. Frank Marken, Department of Chemistry, University of Bath, Claverton Down, Bath BA2 7AY, UK. Email f.marken@bath.ac.uk.

<sup>b</sup> Hanan Al Kutubi, Dr. Liza Rassaei, Department of Chemical Engineering, Delft University of Technology, Delft, The Netherlands.

<sup>c</sup> Dr. Wouter Olthuis, BIOS/Lab-on-a-Chip group, University of Twente, PO Box 217, 7500 Enschede, The Netherlands.

<sup>d</sup> Dr. Geoffrey W. Nelson, Imperial College London, Department of Materials, Royal School of Mines, Exhibition Road, London, SW7 2AZ, UK.

<sup>e</sup> Prof. John S. Foord, Chemistry Research Laboratories, Oxford University, South Parks Road, Oxford OX1 3TA, UK.

<sup>f</sup> Dr. Philip Holdway, Department of Materials, Begbroke Science Park, Sandy Lane, Yarnton, Oxford, OX5 1PF, UK.

<sup>g</sup> Dr. Mariolino Carta, Richard Malpass-Evans, Prof. Neil B. McKeown, School of Chemistry, University of Edinburgh, West Mains Road, Edinburgh, EH9 3JJ, UK.

<sup>h</sup> Prof. Shik Chi Tsang, Inorganic Chemistry Laboratory, University of Oxford, South Parks Road, Oxford OX1 3QR, UK.
